# Supplementary material
Source: PubMed Central journal article supplement (PMC2374857)
Supplement: supp_178_11_1418_v2_1.pdf [file supp_178_11_1418_v2_1.pdf]

#### **Appendix 1: Canadian Stroke Strategy Best Practice and Standards Working Group**

Dr. Steve Phillips, Co-Chair  
Division of Neurology, Queen Elizabeth II Health Sciences Centre,  
Halifax, Nova Scotia

Ms. Alison McDonald, Co-Chair  
Physiotherapy Department, Nova Scotia Rehabilitation Centre, Halifax, Nova Scotia

Dr. Patrice Lindsay  
Performance and standards specialist, Canadian Stroke Network, Ottawa, Ontario

Lisa Ashley  
Senior Advisor, Public Health Agency of Canada, Ottawa, Ontario

Dr. Nigel Ashworth  
University of Alberta, Glenrose Rehabilitation Hospital, Edmonton, Alberta

Dr. Mark Bayley  
University of Toronto, Acquired Brain Injury Physical Medicine and Rehabilitation,  
Toronto Rehabilitation Institute, Toronto, Ontario

Dr. Alan Bell, College of Family Physicians of Canada, Toronto, Ontario

Dr. Lucie Brosseau  
School of Rehabilitation Sciences, University of Ottawa, Ottawa, Ontario

Ms. Nancy Cooper  
Ontario Long Term Care Association, Toronto, Ontario

Ms. Bev Culham  
Project Manager, Alberta Provincial Stroke Strategy, Calgary, Alberta

Dr. Ian Graham  
Vice-president, Knowledge Translation, Canadian Institutes of Health Research,  
Ottawa, Ontario

Dr. Gord Gubitz  
Division of Neurology, Dalhousie University, Halifax, Nova Scotia

Ms. Mary Elizabeth Harriman  
Associate Executive Director, Heart and Stroke Foundation of Canada,  
Ottawa, Ontario

Ms. Katie Lafferty  
Executive Director, Canadian Stroke Network, Ottawa, Ontario

Ms. Debra Lynkowski  
Director, Canadian Stroke Strategy, Ottawa, Ontario

Ms. Valerie MacGillivray  
Island Aphasia Program, Victoria, British Columbia

Dr. Janel Nadeau  
Stroke Survivor, Calgary, Alberta

Ms. Louise Nichol  
Clinical Specialist, Occupational Therapy, Winnipeg Regional Health Authority,  
Winnipeg, Manitoba

Ms. Christina O'Callaghan  
South Western Ontario Regional Stroke Program Manager, London, Ontario

Ms. Elizabeth Swain  
Physiotherapy Neurosciences, Vancouver General Hospital,  
Vancouver, British Columbia

Dr. Jon Witt  
Department of Emergency Medicine, Royal University Hospital,  
Saskatoon, Saskatchewan

Ms. Rika Vander Laan  
Heart and Stroke Foundation of Ontario, Toronto, Ontario

Ms. Laurie Cameron  
Program Coordinator and Executive Assistant, Canadian Stroke Strategy,  
Ottawa, Ontario
